# Supplementary material for: Effect of Annealing on Surface Morphology and Structure of Nickel Coatings Deposited from Deep Eutectic Solvents
Source: MDPI journal article supplement (doi:10.3390/coatings11111347), 2021-11-02
Supplement: s1 [file s1]

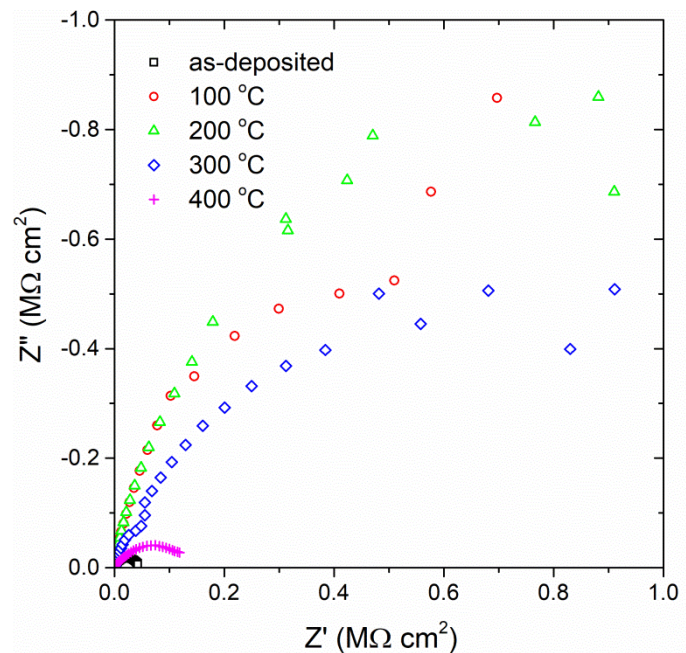

**Supplementary Figure S1.** Nyquist plot of impedance spectra recorded after 168 hours exposure in  $0.05\text{ mol dm}^{-3}$  NaCl for the as-deposited and heat treated nickel coatings for 2 hrs at: 100; 200; 300 and 400 °C.
